# Supplementary material
Source: PubMed Central journal article supplement (PMC6245658)
Supplement: NIHMS1511020-supplement-11481_2018_9818_MOESM1_ESM.pdf [file NIHMS1511020-supplement-11481_2018_9818_MOESM1_ESM.pdf]

### Most current smokers desire genetic susceptibility testing and genetically-efficacious medication

Ami Chiu, BS<sup>1</sup>, Sarah Hartz, MD, PhD<sup>1</sup>, Nina Smock, BA<sup>1</sup>, Jingling Chen, BS<sup>1</sup>, Amaan Qazi<sup>1</sup>, Jeffrey Onyeador<sup>1</sup>, Alex T Ramsey, PhD<sup>1</sup>, Laura J Bierut, MD<sup>1</sup>, Li-Shiun Chen, MD, MPH, ScD<sup>1</sup>

<sup>1</sup>Department of Psychiatry, Washington University School of Medicine, St. Louis, Missouri, USA

**Corresponding Author:** Li-Shiun Chen, M.D., M.P.H., Sc.D.

[chenli@psychiatry.wustl.edu](mailto:chenli@psychiatry.wustl.edu)

**Online Resource 1** Demographic factors and medical history of the observational study sample only, stratified by self-reported desire to receive genetic susceptibility testing results for nicotine dependence. For the observational study sample only, age  $\geq 40$  years, having a college degree, and a positive medical history ( $\geq 1$  medical condition) were significantly associated with high self-reported interest in receiving genetic susceptibility testing results for nicotine dependence.

|                                           | High interest in receiving genetic testing results <sup>a</sup> |     | Univariate logistic regression models predicting high interest in receiving results |           |         | Multivariate logistic regression models predicting high interest in receiving results |           |         |
|-------------------------------------------|-----------------------------------------------------------------|-----|-------------------------------------------------------------------------------------|-----------|---------|---------------------------------------------------------------------------------------|-----------|---------|
|                                           | Yes                                                             | No  | OR                                                                                  | 95% CI    | p-value | OR                                                                                    | 95% CI    | p-value |
| Participants ( <i>n</i> = 1306)           | 1083                                                            | 223 |                                                                                     |           |         |                                                                                       |           |         |
| Desire to receive genetic testing results |                                                                 |     |                                                                                     |           |         |                                                                                       |           |         |
| Extremely interested                      | 541                                                             |     |                                                                                     |           |         |                                                                                       |           |         |
| Very interested                           | 344                                                             |     |                                                                                     |           |         |                                                                                       |           |         |
| Moderately interested                     | 198                                                             |     |                                                                                     |           |         |                                                                                       |           |         |
| Slightly interested                       |                                                                 | 124 |                                                                                     |           |         |                                                                                       |           |         |
| Not at all interested                     |                                                                 | 99  |                                                                                     |           |         |                                                                                       |           |         |
| Gender                                    |                                                                 |     |                                                                                     |           |         |                                                                                       |           |         |
| Male                                      | 689                                                             | 159 |                                                                                     | Reference |         |                                                                                       | Reference |         |
| Female                                    | 394                                                             | 64  | 1.42                                                                                | 1.04-1.95 | .03     | 1.22                                                                                  | 0.88-1.69 | .24     |
| Race                                      |                                                                 |     |                                                                                     |           |         |                                                                                       |           |         |
| Caucasian                                 | 309                                                             | 52  |                                                                                     | Reference |         |                                                                                       | Reference |         |
| African American                          | 686                                                             | 157 | 0.74                                                                                | 0.53-1.03 | .08     | 1.02                                                                                  | 0.71-1.46 | .92     |
| Other                                     | 88                                                              | 14  | 1.06                                                                                | 0.56-2.00 | .86     | 1.31                                                                                  | 0.69-2.51 | .41     |
| Age (years)                               |                                                                 |     |                                                                                     |           |         |                                                                                       |           |         |
| <30                                       | 246                                                             | 62  |                                                                                     | Reference |         |                                                                                       | Reference |         |
| 30-34                                     | 259                                                             | 75  | 0.87                                                                                | 0.60-1.27 | .47     | 0.83                                                                                  | 0.57-1.22 | .35     |
| 35-39                                     | 286                                                             | 49  | 1.47                                                                                | 0.98-2.22 | .07     | 1.30                                                                                  | 0.85-1.97 | .22     |
| $\geq 40$                                 | 292                                                             | 37  | 1.99                                                                                | 1.28-3.09 | .002    | 1.87                                                                                  | 1.20-2.89 | .005    |
| Household Income                          |                                                                 |     |                                                                                     |           |         |                                                                                       |           |         |
| Above federal poverty level               | 643                                                             | 122 |                                                                                     | Reference |         |                                                                                       | Reference |         |
| Below federal poverty level               | 440                                                             | 101 | 0.83                                                                                | 0.62-1.11 | .20     | 0.95                                                                                  | 0.70-1.29 | .74     |
| Educational Attainment                    |                                                                 |     |                                                                                     |           |         |                                                                                       |           |         |
| Up to a high school diploma or GED        | 726                                                             | 178 |                                                                                     | Reference |         |                                                                                       | Reference |         |
| 1-3 years of college                      | 240                                                             | 40  | 1.47                                                                                | 1.01-2.14 | .04     | 1.29                                                                                  | 0.88-1.91 | .19     |
| Bachelor's degree or higher               | 117                                                             | 5   | 5.74                                                                                | 2.31-14.3 | .0002   | 4.71                                                                                  | 1.85-12.0 | .001    |
| Medical History                           |                                                                 |     |                                                                                     |           |         |                                                                                       |           |         |
| None                                      | 457                                                             | 125 |                                                                                     | Reference |         |                                                                                       | Reference |         |
| $\geq 1$ medical condition                | 626                                                             | 98  | 1.75                                                                                | 1.31-2.34 | .0002   | 1.51                                                                                  | 1.12-2.04 | .007    |

<sup>a</sup>“High interest” was defined as participants reporting that they were “moderately”, “very”, or “extremely” interested in receiving genetic results
