# Supplementary material
Source: PubMed Central journal article supplement (PMC6245658)
Supplement: NIHMS1511020-supplement-11481_2018_9818_MOESM2_ESM.pdf [file NIHMS1511020-supplement-11481_2018_9818_MOESM2_ESM.pdf]

### Most current smokers desire genetic susceptibility testing and genetically-efficacious medication

Ami Chiu, BS<sup>1</sup>, Sarah Hartz, MD, PhD<sup>1</sup>, Nina Smock, BA<sup>1</sup>, Jingling Chen, BS<sup>1</sup>, Amaan Qazi<sup>1</sup>, Jeffrey Onyeador<sup>1</sup>, Alex T Ramsey, PhD<sup>1</sup>, Laura J Bierut, MD<sup>1</sup>, Li-Shiun Chen, MD, MPH, ScD<sup>1</sup>

<sup>1</sup>Department of Psychiatry, Washington University School of Medicine, St. Louis, Missouri, USA

**Corresponding Author:** Li-Shiun Chen, M.D., M.P.H., Sc.D.

[chenli@psychiatry.wustl.edu](mailto:chenli@psychiatry.wustl.edu)

**Online Resource 2** Demographic factors, medical history, and hypothetical pharmacogenetic responses to smoking cessation medication of the clinical trial sample, stratified by self-reported desire to take smoking cessation medication. An above average hypothetical genetic response to smoking cessation medication and having a college degree were significantly associated with clinical trial participants' self-reported desire to take smoking cessation medication in both univariate and multivariate repeated measures logistic regression analyses.

|                                     | Desire to take smoking cessation medication <sup>b</sup> |     | Univariate GEE <sup>c</sup> models predicting desire to take smoking cessation medication |           |         | Multivariate GEE <sup>c</sup> models predicting desire to take smoking cessation medication |           |         |
|-------------------------------------|----------------------------------------------------------|-----|-------------------------------------------------------------------------------------------|-----------|---------|---------------------------------------------------------------------------------------------|-----------|---------|
|                                     | Yes                                                      | No  | OR                                                                                        | 95% CI    | p-value | OR                                                                                          | 95% CI    | p-value |
| Participants <sup>a</sup> (n = 474) | 751                                                      | 197 |                                                                                           |           |         |                                                                                             |           |         |
| Hypothetical response to medication |                                                          |     |                                                                                           |           |         |                                                                                             |           |         |
| Below average                       | 289                                                      | 185 |                                                                                           | Reference |         |                                                                                             | Reference |         |
| Above average                       | 462                                                      | 12  | 24.6                                                                                      | 14.0-43.4 | <.0001  | 29.0                                                                                        | 15.7-53.7 | <.0001  |
| Gender                              |                                                          |     |                                                                                           |           |         |                                                                                             |           |         |
| Male                                | 318                                                      | 82  |                                                                                           | Reference |         |                                                                                             | Reference |         |
| Female                              | 433                                                      | 115 | 0.97                                                                                      | 0.72-1.31 | .85     | 0.96                                                                                        | 0.66-1.41 | .85     |
| Race                                |                                                          |     |                                                                                           |           |         |                                                                                             |           |         |
| Caucasian                           | 513                                                      | 131 |                                                                                           | Reference |         |                                                                                             | Reference |         |
| African American                    | 198                                                      | 52  | 0.97                                                                                      | 0.67-1.40 | .88     | 0.89                                                                                        | 0.56-1.44 | .65     |
| Other                               | 40                                                       | 14  | 0.73                                                                                      | 0.41-1.31 | .29     | 0.75                                                                                        | 0.35-1.60 | .45     |
| Age (years)                         |                                                          |     |                                                                                           |           |         |                                                                                             |           |         |
| <30                                 | 68                                                       | 24  |                                                                                           | Reference |         |                                                                                             | Reference |         |
| 30-34                               | 53                                                       | 19  | 0.93                                                                                      | 0.52-1.66 | .81     | 0.99                                                                                        | 0.42-2.29 | .97     |
| 35-39                               | 107                                                      | 29  | 1.23                                                                                      | 0.71-2.13 | .46     | 1.55                                                                                        | 0.74-3.25 | .25     |
| ≥40                                 | 523                                                      | 125 | 1.39                                                                                      | 0.89-2.18 | .14     | 1.84                                                                                        | 0.98-3.45 | .06     |
| Household Income                    |                                                          |     |                                                                                           |           |         |                                                                                             |           |         |
| Above federal poverty level         | 660                                                      | 182 |                                                                                           | Reference |         |                                                                                             | Reference |         |
| Below federal poverty level         | 91                                                       | 15  | 1.67                                                                                      | 0.91-3.06 | .1      | 1.87                                                                                        | 0.91-3.83 | .09     |
| Educational Attainment              |                                                          |     |                                                                                           |           |         |                                                                                             |           |         |
| Up to 1-3 years of college          | 580                                                      | 132 |                                                                                           | Reference |         |                                                                                             | Reference |         |
| Bachelor's degree or higher         | 171                                                      | 65  | 0.60                                                                                      | 0.44-0.82 | .001    | 0.51                                                                                        | 0.33-0.78 | .002    |
| Medical History                     |                                                          |     |                                                                                           |           |         |                                                                                             |           |         |
| None                                | 261                                                      | 67  |                                                                                           | Reference |         |                                                                                             | Reference |         |
| ≥1 medical condition                | 490                                                      | 130 | 0.97                                                                                      | 0.70-1.32 | .83     | 0.83                                                                                        | 0.55-1.25 | .37     |

<sup>a</sup>474 participants responded twice, once based on a hypothetical below average response to medication, and once based on an above average response

<sup>b</sup>“Desire” was defined as a participant response in the range of 5-7 on a Likert scale of increasing desire from 1 (“no desire to quit”) to 7 (“extremely strong desire”)

<sup>c</sup>Generalized estimating equation (used for repeated measures logistic regression)
