# Supplementary material
Source: PubMed Central journal article supplement (PMC6245658)
Supplement: NIHMS1511020-supplement-11481_2018_9818_MOESM3_ESM.pdf [file NIHMS1511020-supplement-11481_2018_9818_MOESM3_ESM.pdf]

### Most current smokers desire genetic susceptibility testing and genetically-efficacious medication

Ami Chiu, BS<sup>1</sup>, Sarah Hartz, MD, PhD<sup>1</sup>, Nina Smock, BA<sup>1</sup>, Jingling Chen, BS<sup>1</sup>, Amaan Qazi<sup>1</sup>, Jeffrey Onyeador<sup>1</sup>, Alex T Ramsey, PhD<sup>1</sup>, Laura J Bierut, MD<sup>1</sup>, Li-Shiun Chen, MD, MPH, ScD<sup>1</sup>

<sup>1</sup>Department of Psychiatry, Washington University School of Medicine, St. Louis, Missouri, USA

**Corresponding Author:** Li-Shiun Chen, M.D., M.P.H., Sc.D. [chenli@psychiatry.wustl.edu](mailto:chenli@psychiatry.wustl.edu)

**Online Resource 3** Self-reported desires to take smoking cessation medication with a hypothetical below or above average genetic response, demographic factors, and medical history of the clinical trial sample (excluding 182 participants whose self-reported desires were the maximum for both hypothetical genetic responses), stratified by whether individual desire to take medication increased when the hypothetical genetic response improved from below average to above average. Having no desire to take medication with a hypothetical below average genetic response was significantly associated with an increased desire to take smoking cessation medication with an improved hypothetical genetic response in both univariate and multivariate logistic regression analyses. African American race was significantly associated with a decreased likelihood of having an increased desire to take medication.

|                                                                | Increased desire to take medication with improved genetic response <sup>a</sup> |            | Univariate logistic regression models predicting increased desire to take medication |           |         | Multivariate logistic regression models predicting increased desire to take medication |            |         |
|----------------------------------------------------------------|---------------------------------------------------------------------------------|------------|--------------------------------------------------------------------------------------|-----------|---------|----------------------------------------------------------------------------------------|------------|---------|
|                                                                | Yes                                                                             | No         | OR                                                                                   | 95% CI    | p-value | OR                                                                                     | 95% CI     | p-value |
| <b>Participants (n = 292)</b>                                  |                                                                                 |            |                                                                                      |           |         |                                                                                        |            |         |
| Desire with below average response (mean/SE) <sup>b</sup>      | 3.59/1.46                                                                       | 5.21/1.81  |                                                                                      |           |         |                                                                                        |            |         |
| No desire (1-4)                                                | 176                                                                             | 9          | 5.96                                                                                 | 2.66-13.4 | <.0001  | 9.93                                                                                   | 3.80-26.0  | <.0001  |
| Desire (5-7)                                                   | 82                                                                              | 25         |                                                                                      | Reference |         |                                                                                        | Reference  |         |
| Desire with above average response (mean/SE) <sup>b</sup>      | 6.78/0.61                                                                       | 4.68/1.43  |                                                                                      |           |         |                                                                                        |            |         |
| Change in desire with improved response (mean/SE) <sup>c</sup> | 3.19/1.48                                                                       | -0.53/0.75 |                                                                                      |           |         |                                                                                        |            |         |
| <b>Gender</b>                                                  |                                                                                 |            |                                                                                      |           |         |                                                                                        |            |         |
| Male                                                           | 97                                                                              | 19         |                                                                                      | Reference |         |                                                                                        | Reference  |         |
| Female                                                         | 161                                                                             | 15         | 2.10                                                                                 | 1.02-4.33 | 0.04    | 2.87                                                                                   | 1.23-6.68  | 0.01    |
| <b>Race</b>                                                    |                                                                                 |            |                                                                                      |           |         |                                                                                        |            |         |
| Caucasian                                                      | 195                                                                             | 15         |                                                                                      | Reference |         |                                                                                        | Reference  |         |
| African American                                               | 46                                                                              | 18         | 0.20                                                                                 | 0.09-0.42 | <.0001  | 0.10                                                                                   | 0.04-0.28  | <.0001  |
| Other                                                          | 17                                                                              | 1          | 1.31                                                                                 | 0.16-10.5 | 0.80    | 0.77                                                                                   | 0.08-7.09  | 0.82    |
| <b>Age (years)</b>                                             |                                                                                 |            |                                                                                      |           |         |                                                                                        |            |         |
| <30                                                            | 28                                                                              | 6          |                                                                                      | Reference |         |                                                                                        | Reference  |         |
| 30-34                                                          | 29                                                                              | 1          | 6.21                                                                                 | 0.70-55.0 | 0.10    | 10.2                                                                                   | 0.87-119.5 | 0.06    |
| 35-39                                                          | 36                                                                              | 6          | 1.29                                                                                 | 0.37-4.42 | 0.69    | 1.83                                                                                   | 0.38-8.95  | 0.45    |
| ≥40                                                            | 165                                                                             | 21         | 1.68                                                                                 | 0.62-4.54 | 0.30    | 3.64                                                                                   | 0.92-14.4  | 0.07    |
| <b>Household Income</b>                                        |                                                                                 |            |                                                                                      |           |         |                                                                                        |            |         |
| Above federal poverty level                                    | 238                                                                             | 25         |                                                                                      | Reference |         |                                                                                        | Reference  |         |
| Below federal poverty level                                    | 20                                                                              | 9          | 0.23                                                                                 | 0.1-0.57  | 0.001   | 0.57                                                                                   | 0.19-1.76  | 0.33    |
| <b>Educational Attainment</b>                                  |                                                                                 |            |                                                                                      |           |         |                                                                                        |            |         |
| Up to 1-3 years of college                                     | 179                                                                             | 24         |                                                                                      | Reference |         |                                                                                        | Reference  |         |
| Bachelor's degree or higher                                    | 79                                                                              | 10         | 1.06                                                                                 | 0.48-2.32 | 0.89    | 0.59                                                                                   | 0.24-1.45  | 0.25    |
| <b>Medical History</b>                                         |                                                                                 |            |                                                                                      |           |         |                                                                                        |            |         |
| None                                                           | 98                                                                              | 11         |                                                                                      | Reference |         |                                                                                        | Reference  |         |
| ≥1 medical condition                                           | 160                                                                             | 23         | 0.78                                                                                 | 0.37-1.67 | 0.52    | 0.60                                                                                   | 0.23-1.54  | 0.29    |

<sup>a</sup>Desire to take smoking cessation medication was increased if self-reported desire to take medication with a hypothetical above average genetic response to the medication was greater than self-reported desire to take medication with a hypothetical below average genetic response

<sup>b</sup>Likert scale of increasing desire from 1 ("no desire to quit") to 7 ("extremely strong desire")

<sup>c</sup>Desire with below average response subtracted from desire with above average response
